# Supplementary material
Source: HighWire-hosted journal article supplement (https://bjsm.bmj.com/content/bjsports-2020-102072)

Table S1. Frequency distribution of Symptom Severity at baseline.

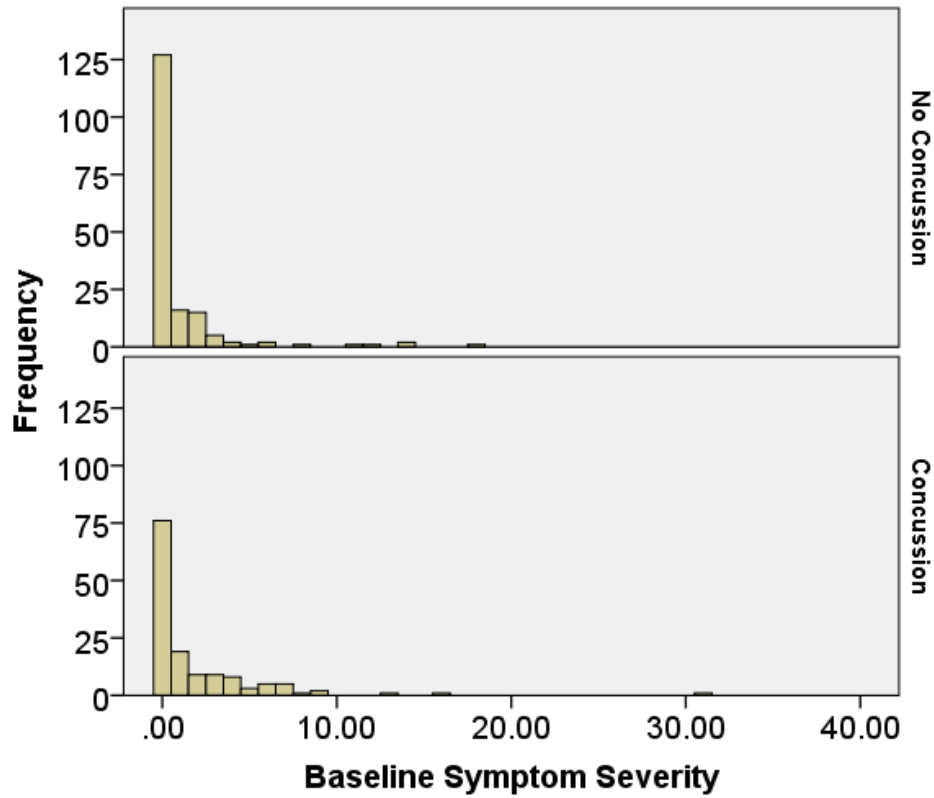

Table S2. Frequency distribution of Symptom Severity at acute evaluation.

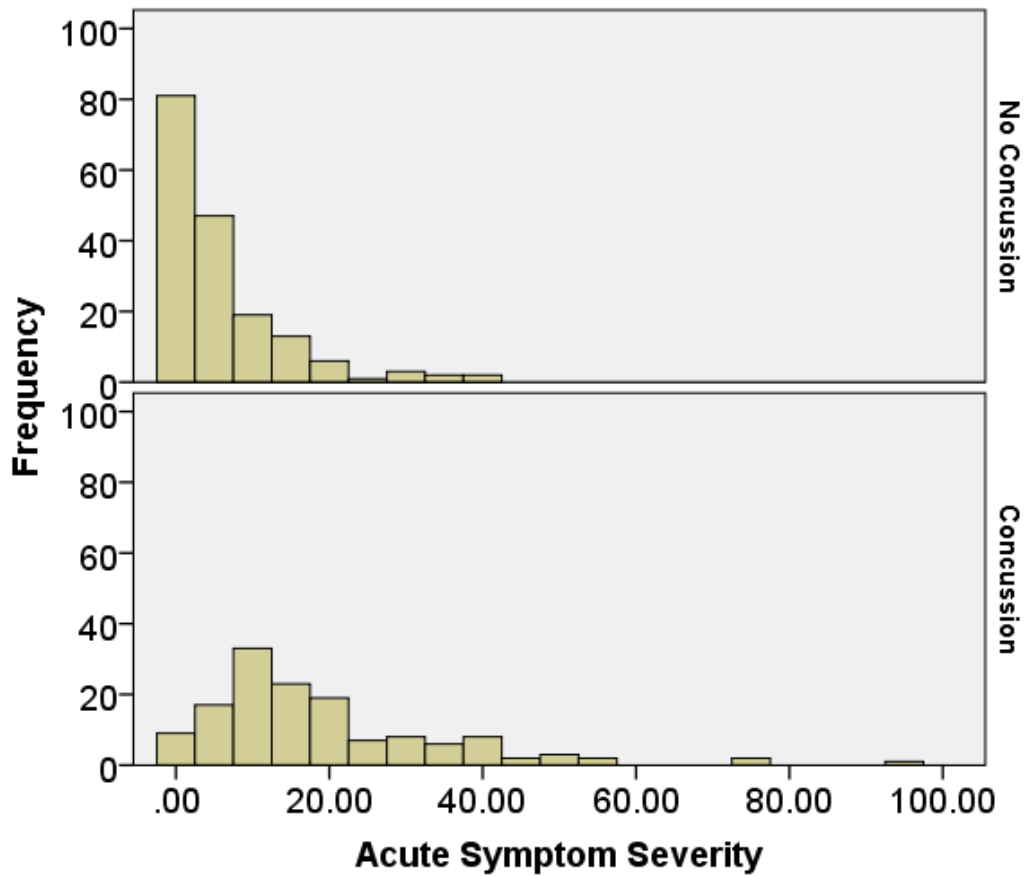

Table S3. Frequency distribution of Change in Symptom Severity.

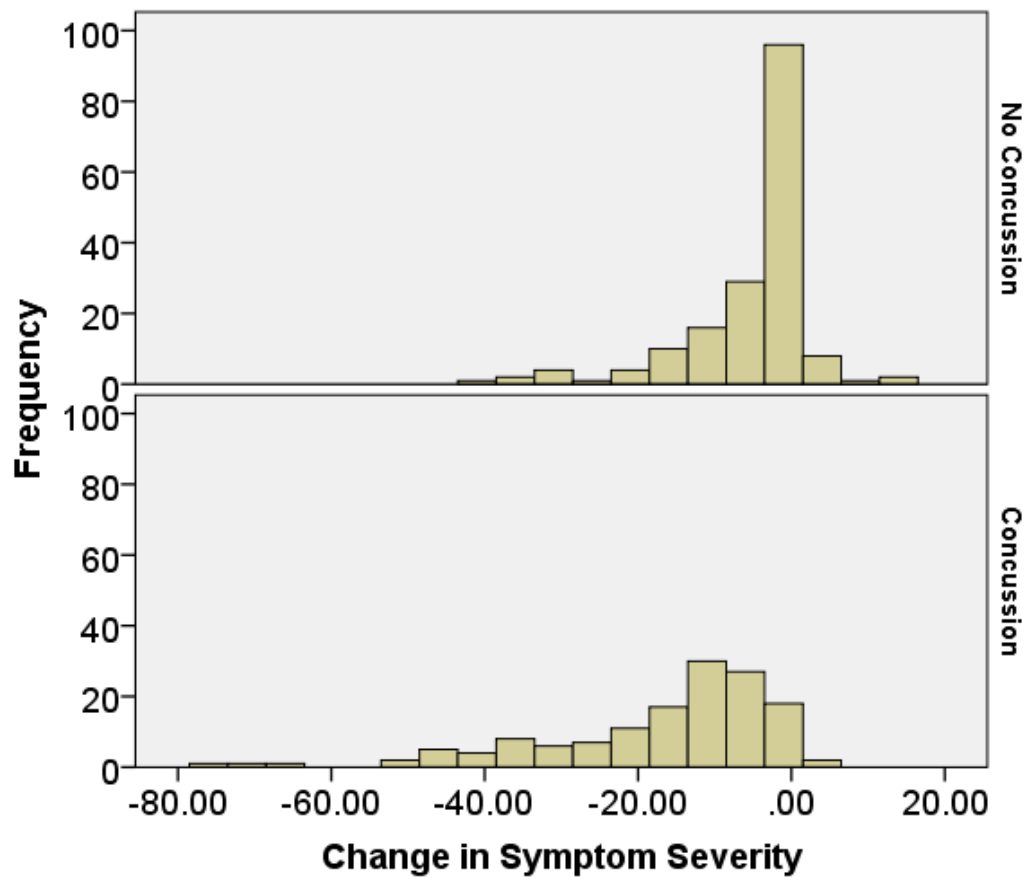

Table S4. Frequency distribution of Total Symptoms at baseline.

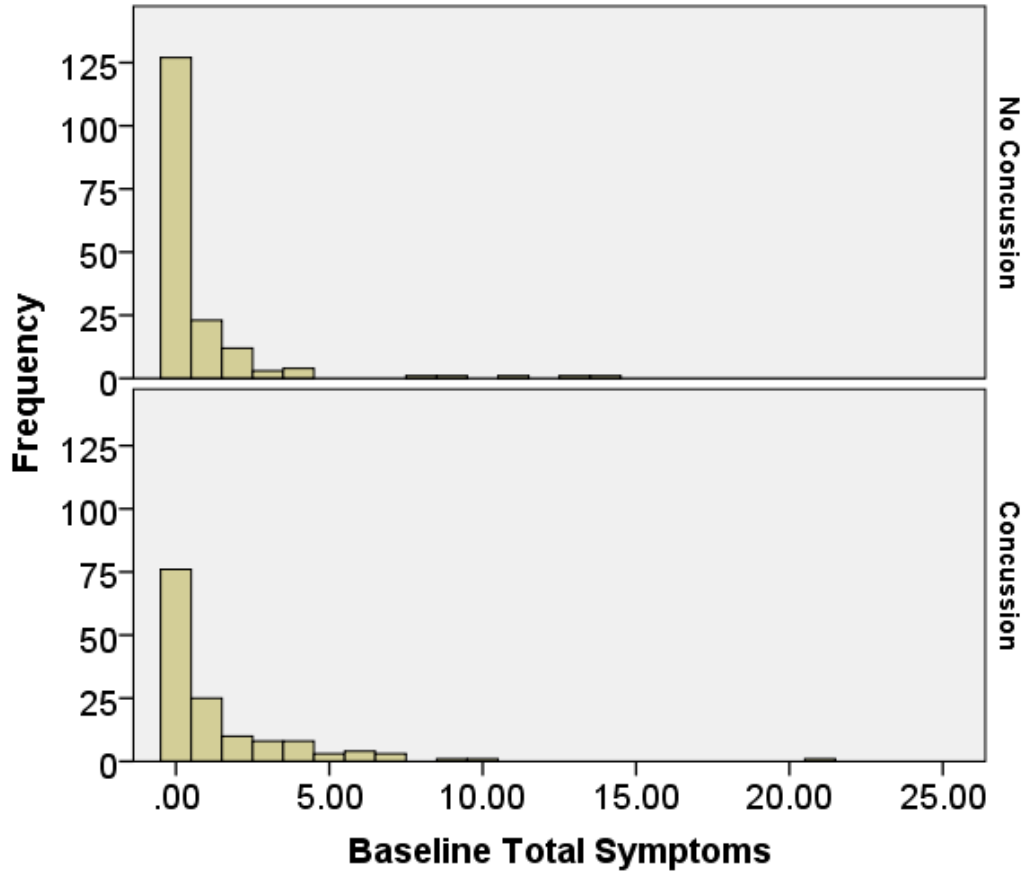

Table S5. Frequency distribution of Total Symptoms at acute evaluation.

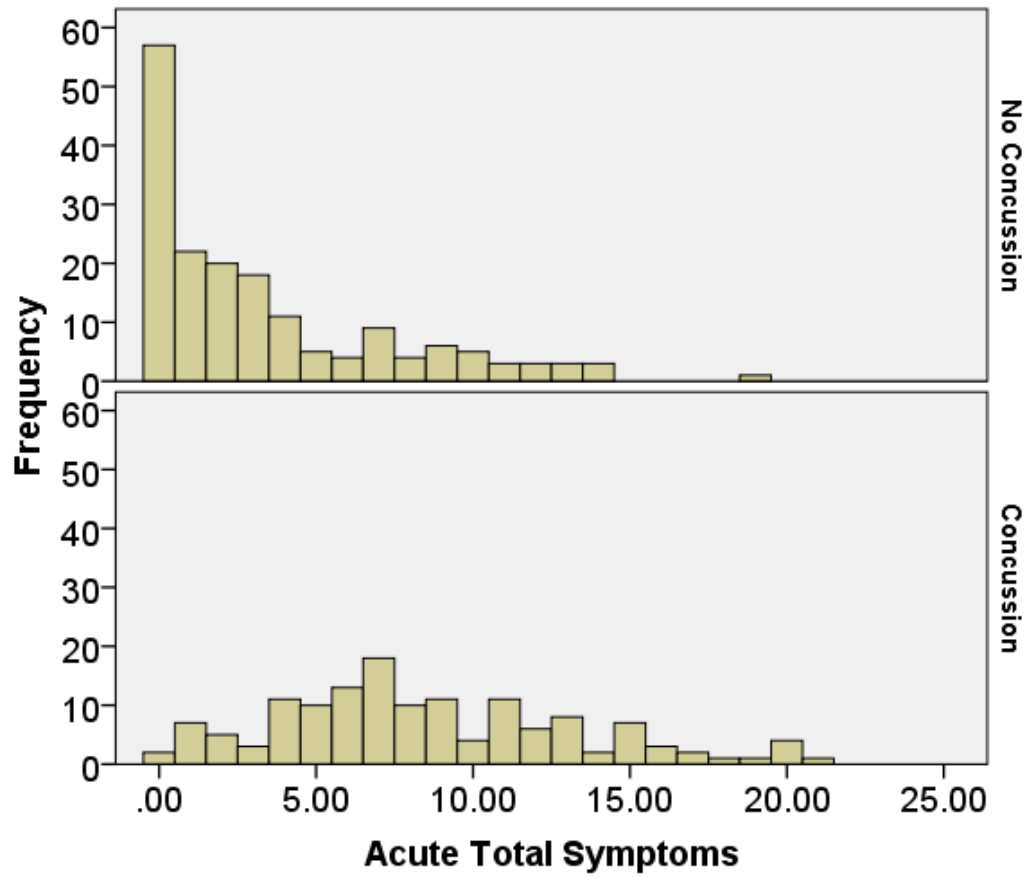

Table S6. Frequency distribution of Change in Total Symptoms at acute evaluation.

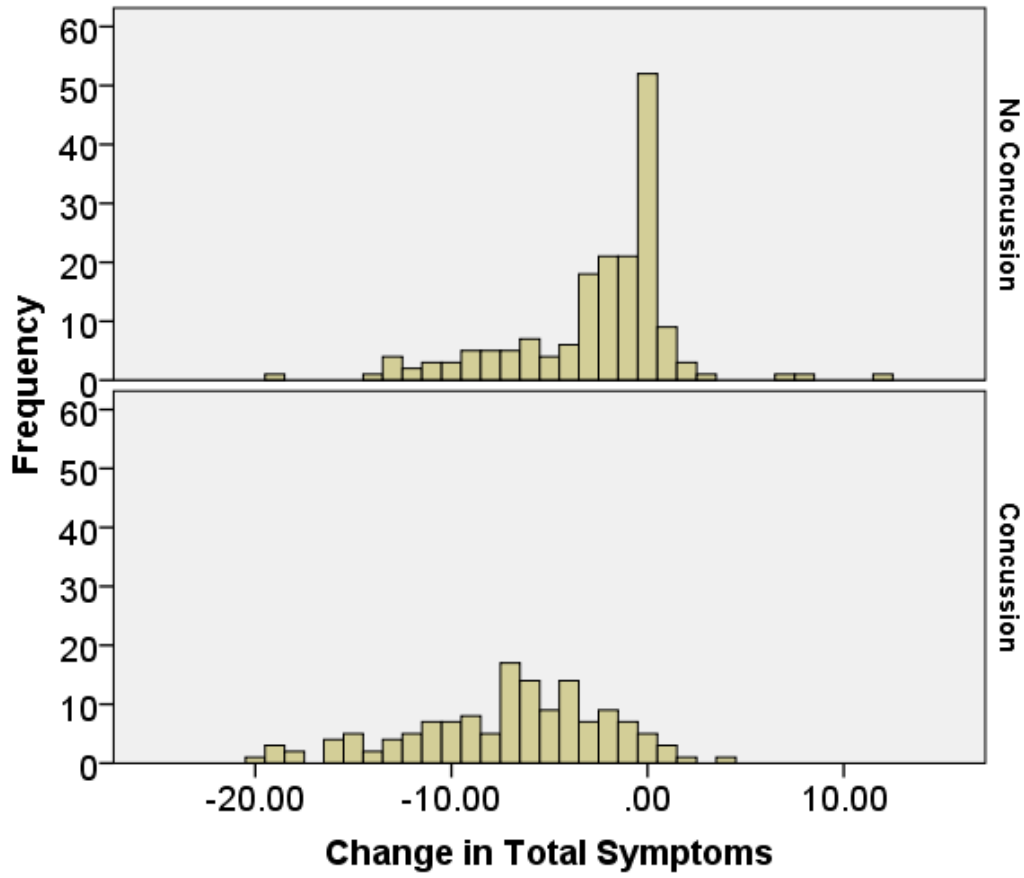

Table S7. Frequency distribution of Immediate Memory 5-word list (Total Score), English preference, baseline (N=1,123).

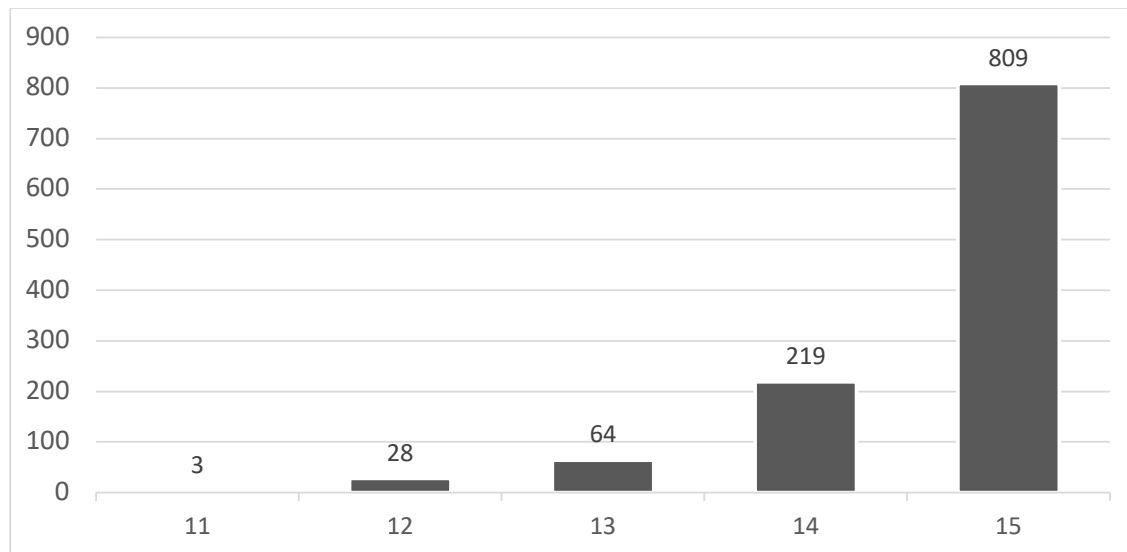

Table S8. Frequency distribution Delayed Recall scores 5-word list, English preference, baseline (N=1,123).

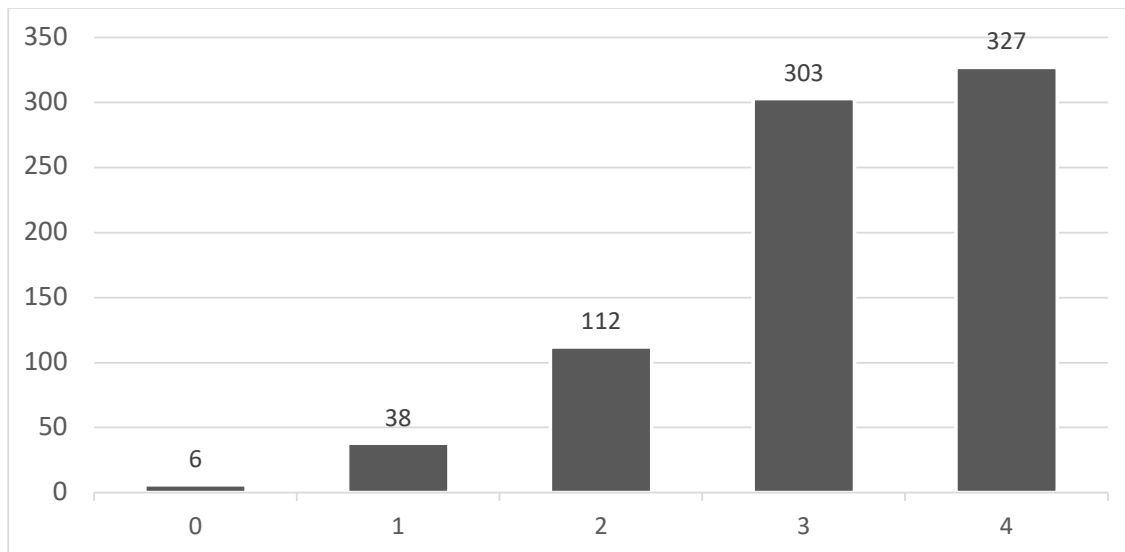



Table S9: Frequency distribution of 10-word Immediate Memory list (Total Score), English language preference, baseline (N=1,482)

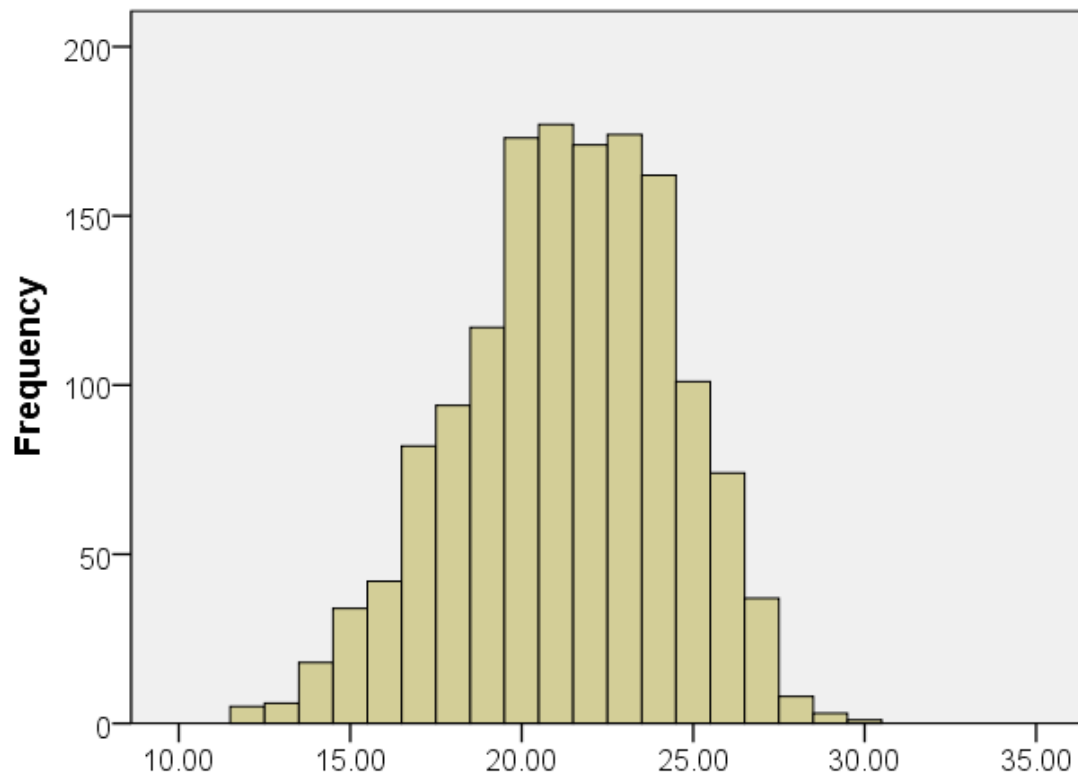

Table S10: Frequency distribution of 10-word Delayed Memory list, English language preference, baseline (N=1,482)

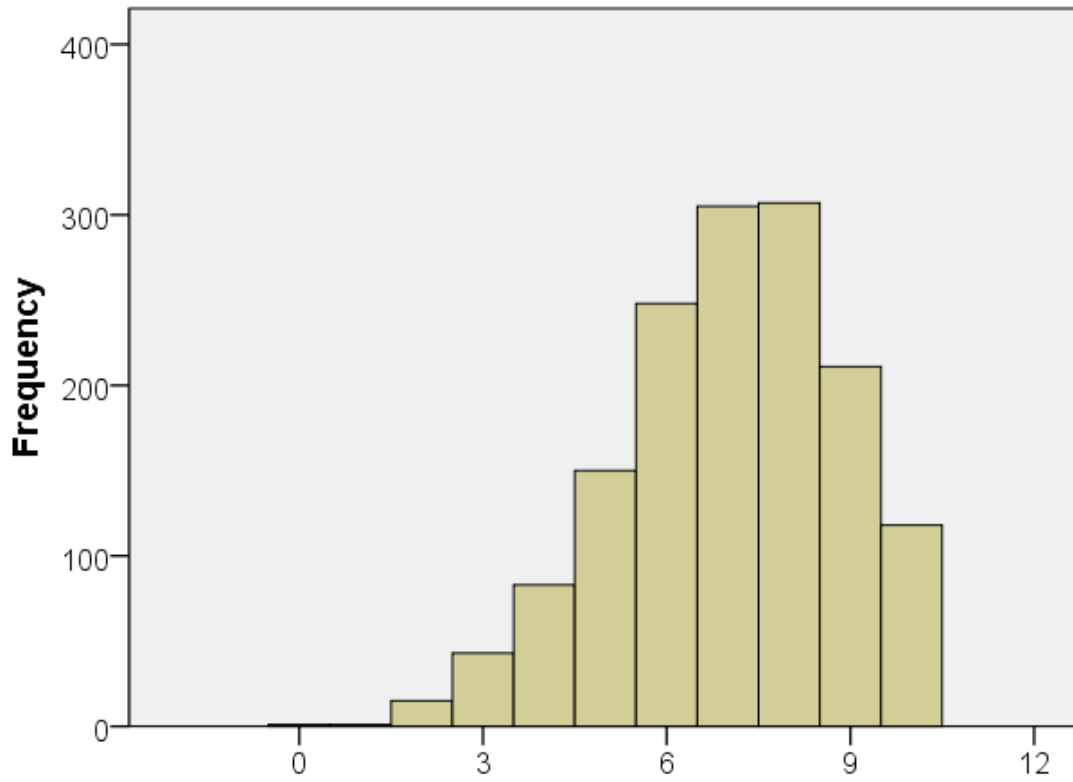

Table S11. Frequency distribution of Concentration at baseline evaluation.

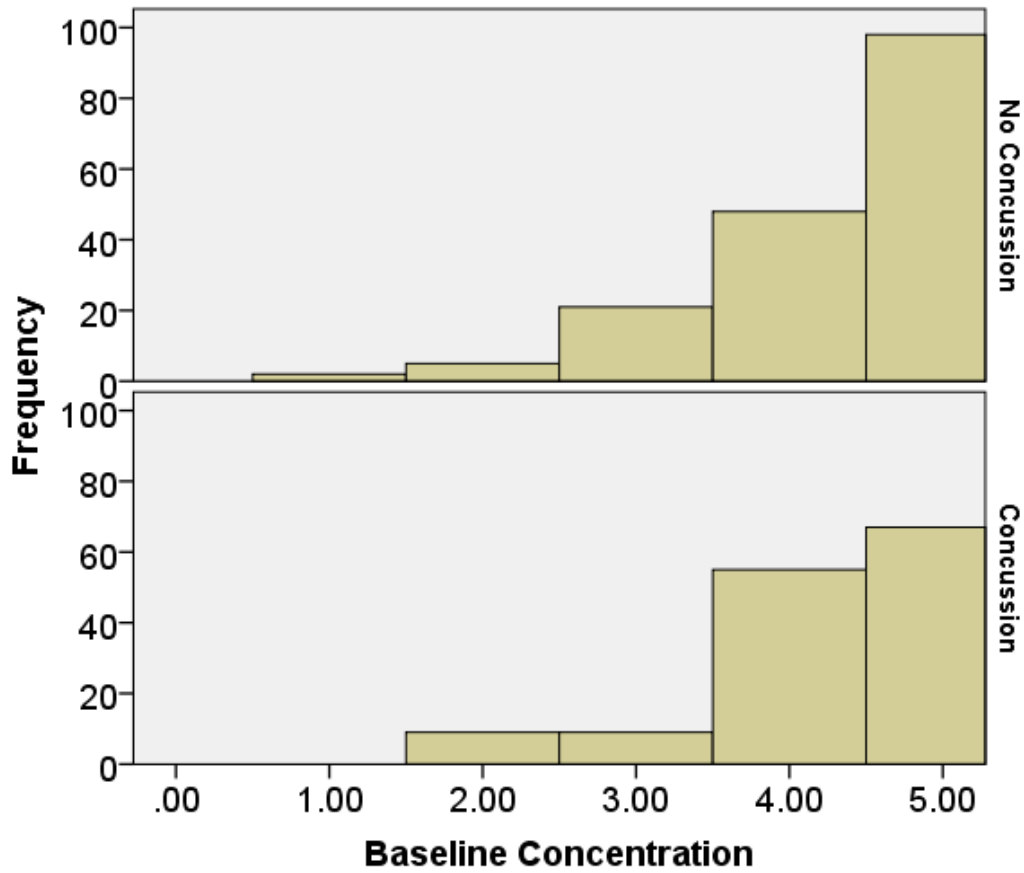

Table S12. Frequency distribution of Concentration at acute evaluation.

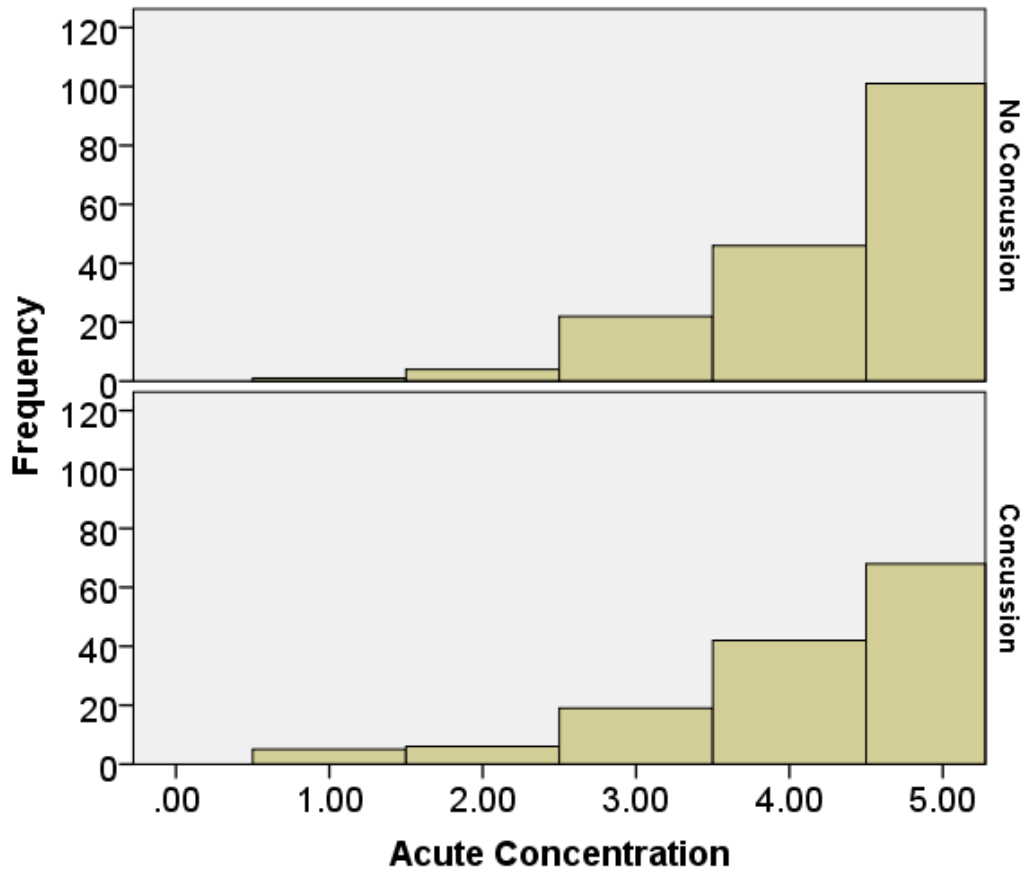

Table S13. Frequency distribution of Symptom Severity at acute evaluation.

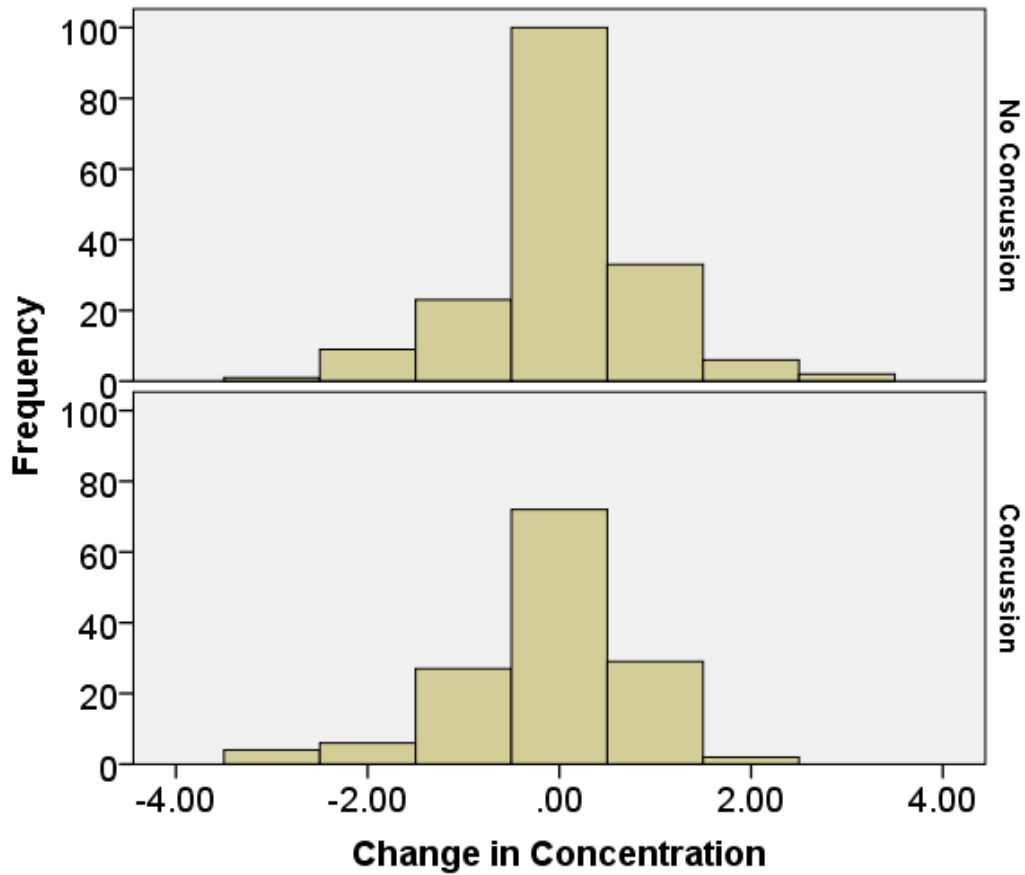

Table S14. Frequency distribution of Immediate Memory at baseline.

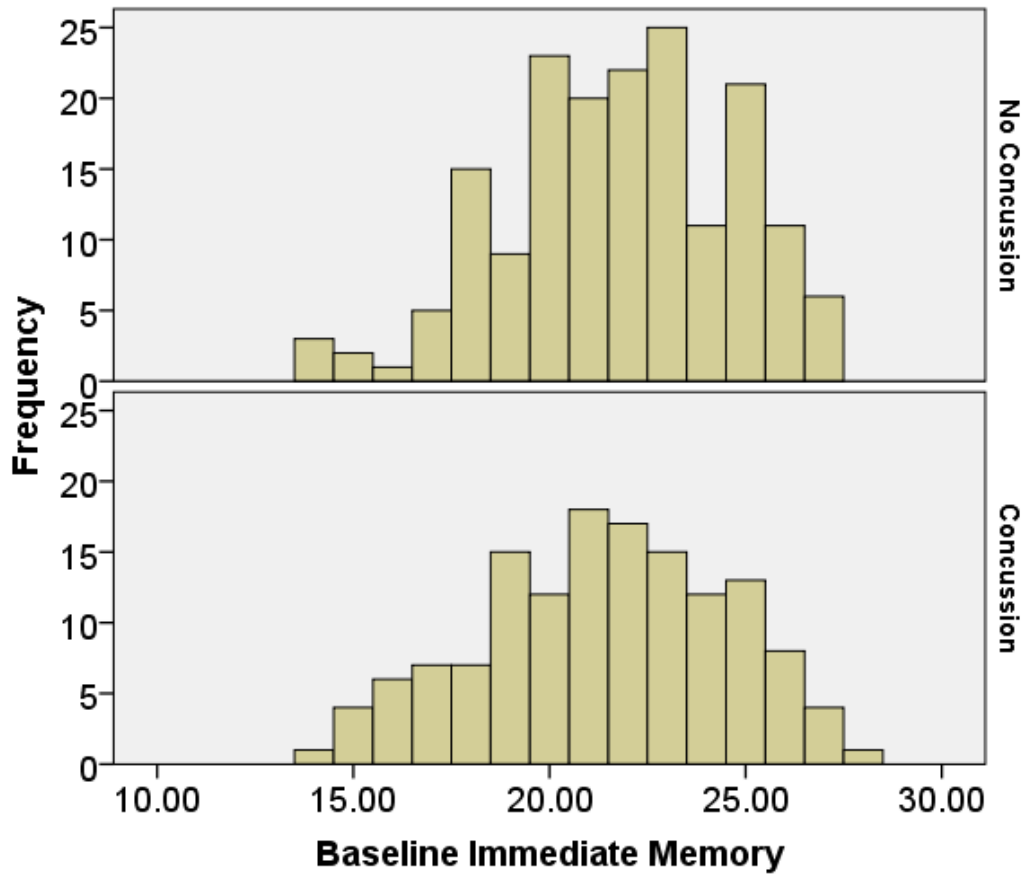

Table S15. Frequency distribution of Immediate Memory at acute evaluation.

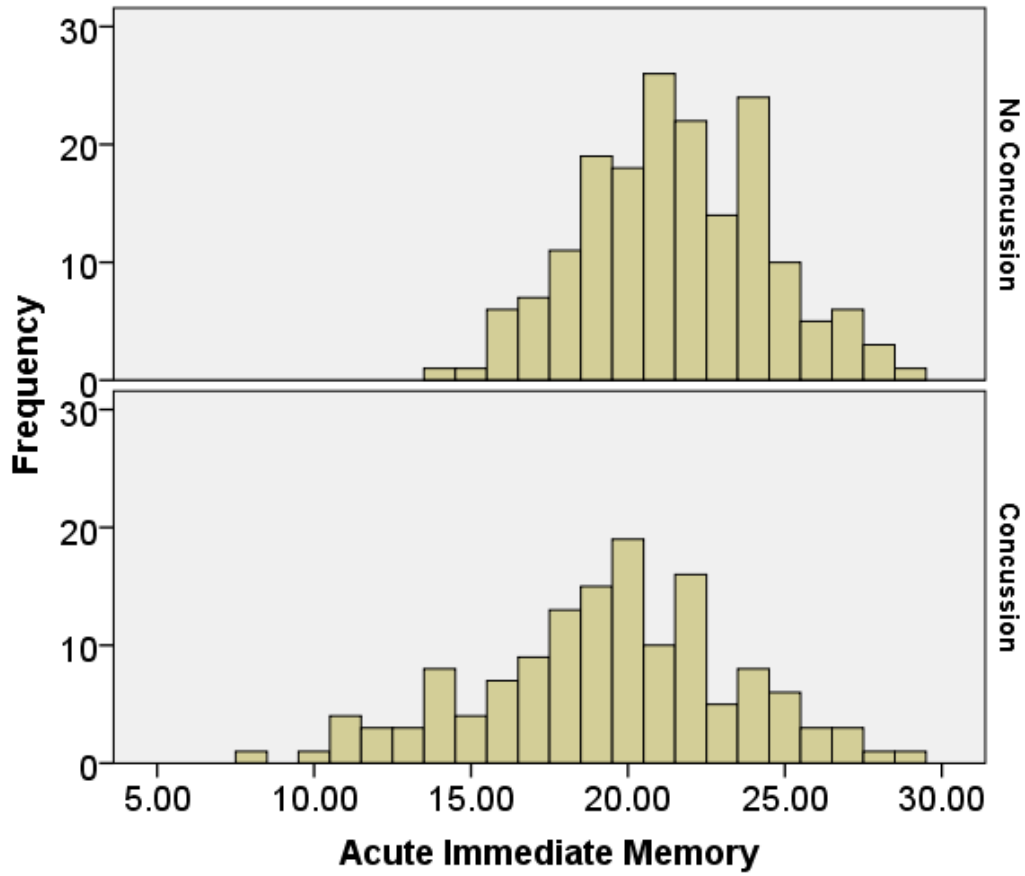

Table S16. Frequency distribution of Change in Immediate Memory.

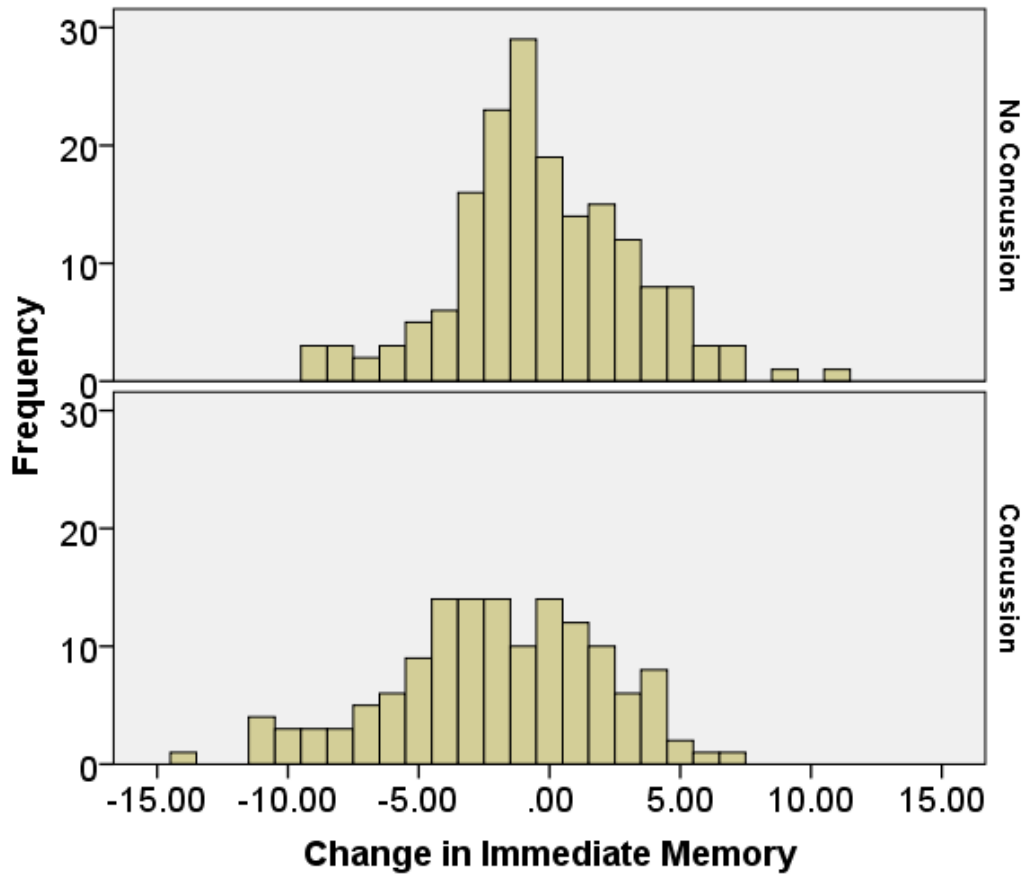



Table S17. Frequency distribution of Delayed Memory at baseline.

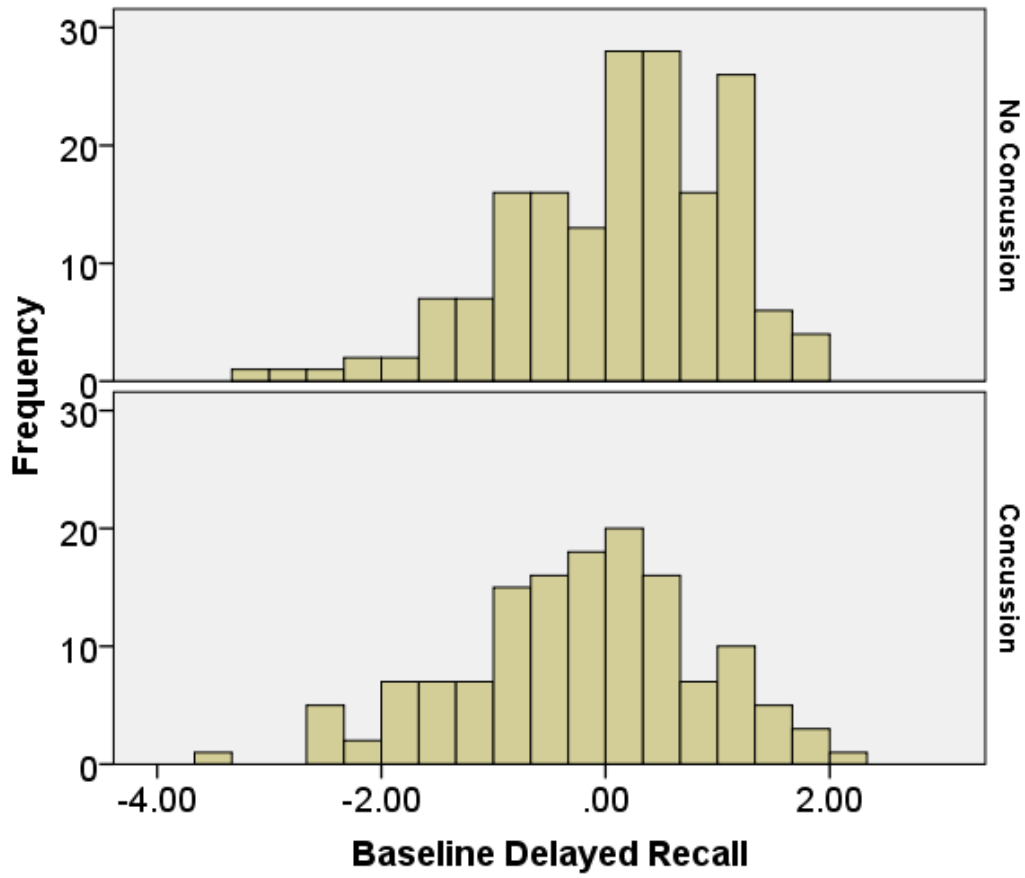

Table S18. Frequency distribution of Delayed Memory at acute evaluation.

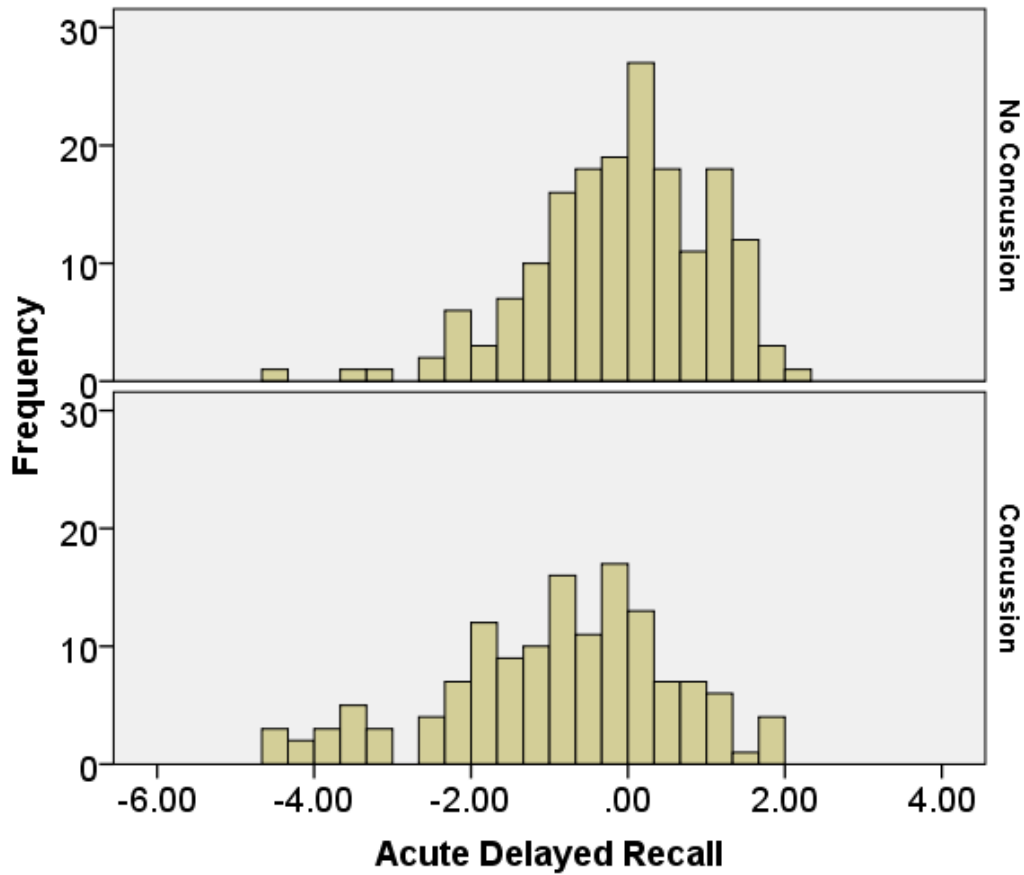

Table S19. Frequency distribution of Change in Delayed Memory.

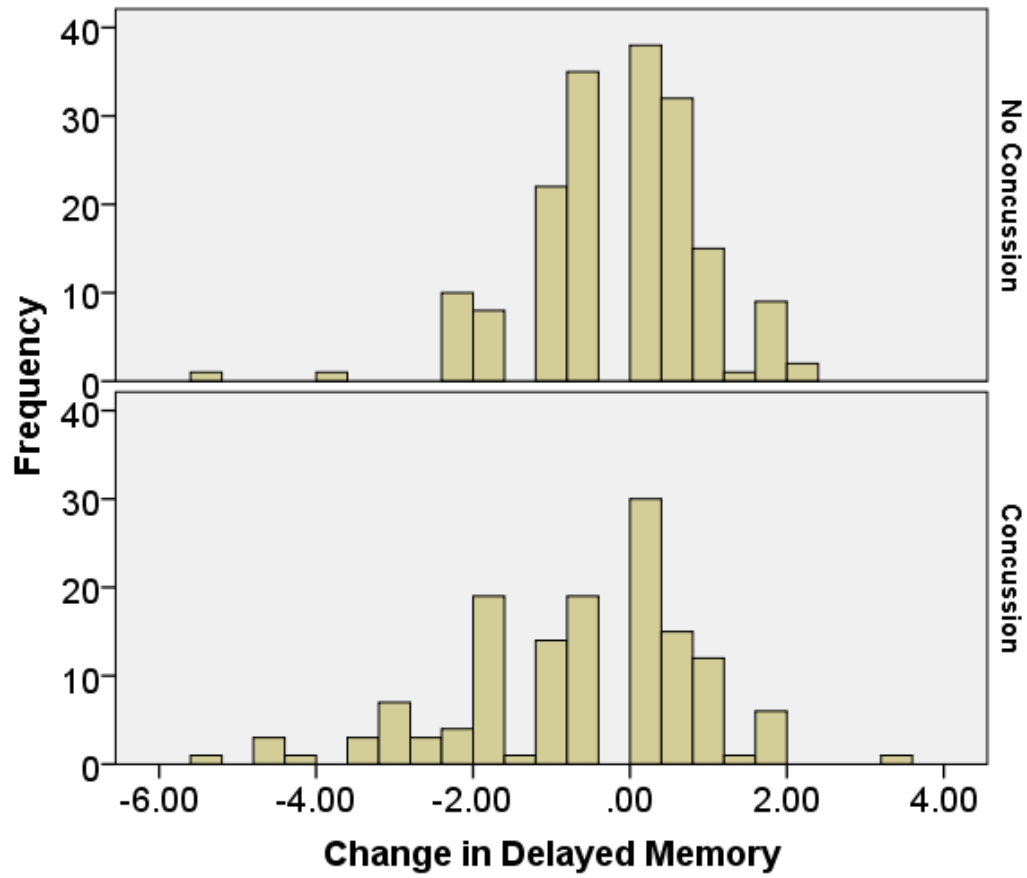

Table S20. Frequency distribution of mBESS Total Errors at baseline.

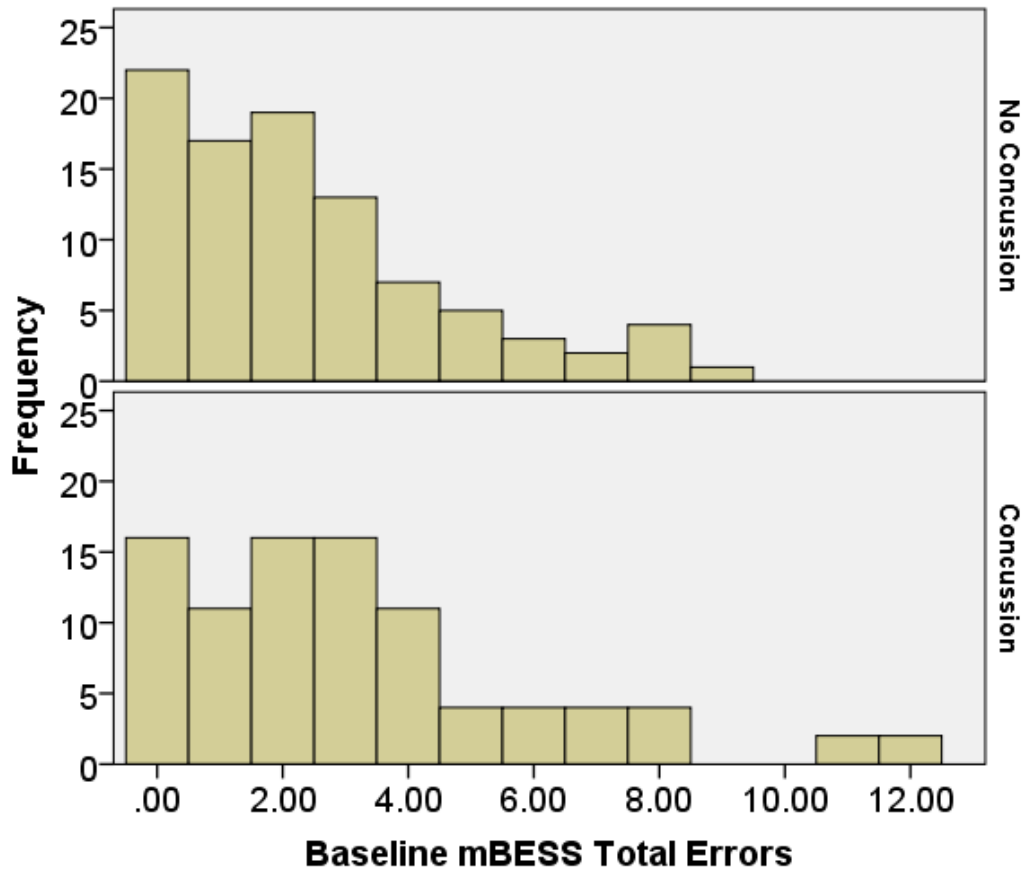

Table S21. Frequency distribution of mBESS Total Errors at acute evaluation.

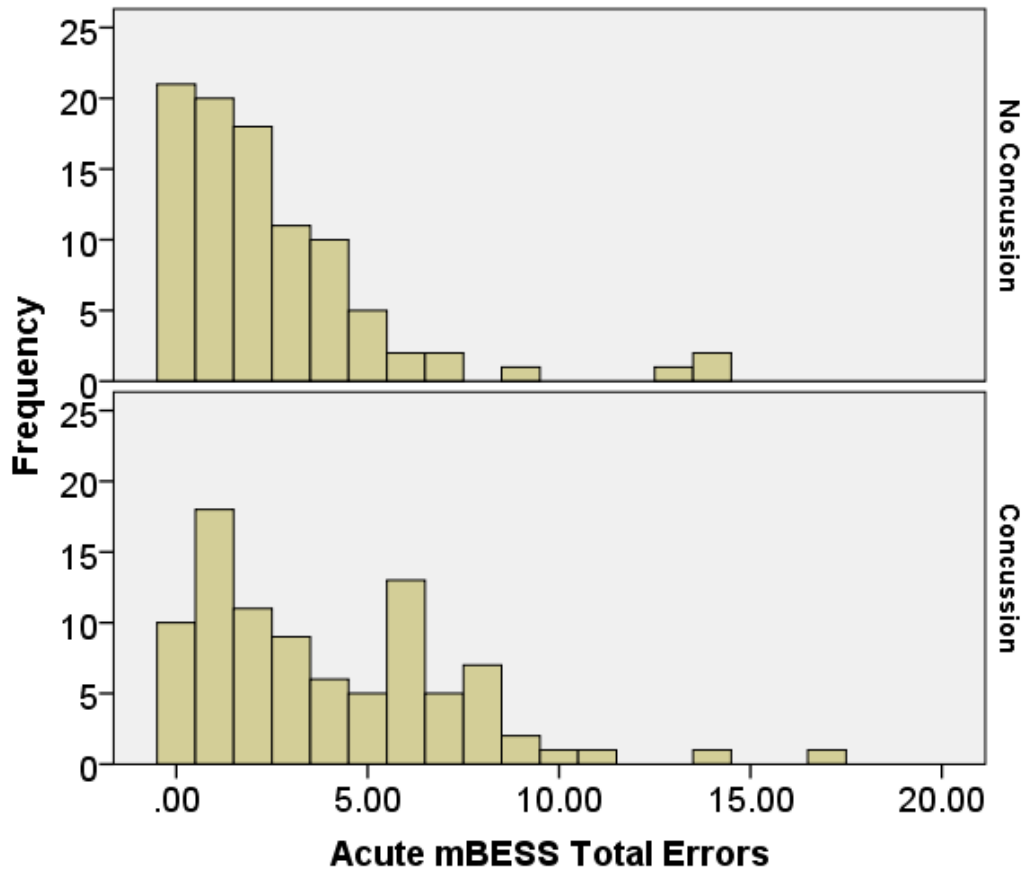

Table S22. Frequency distribution of change in mBESS Total Errors.

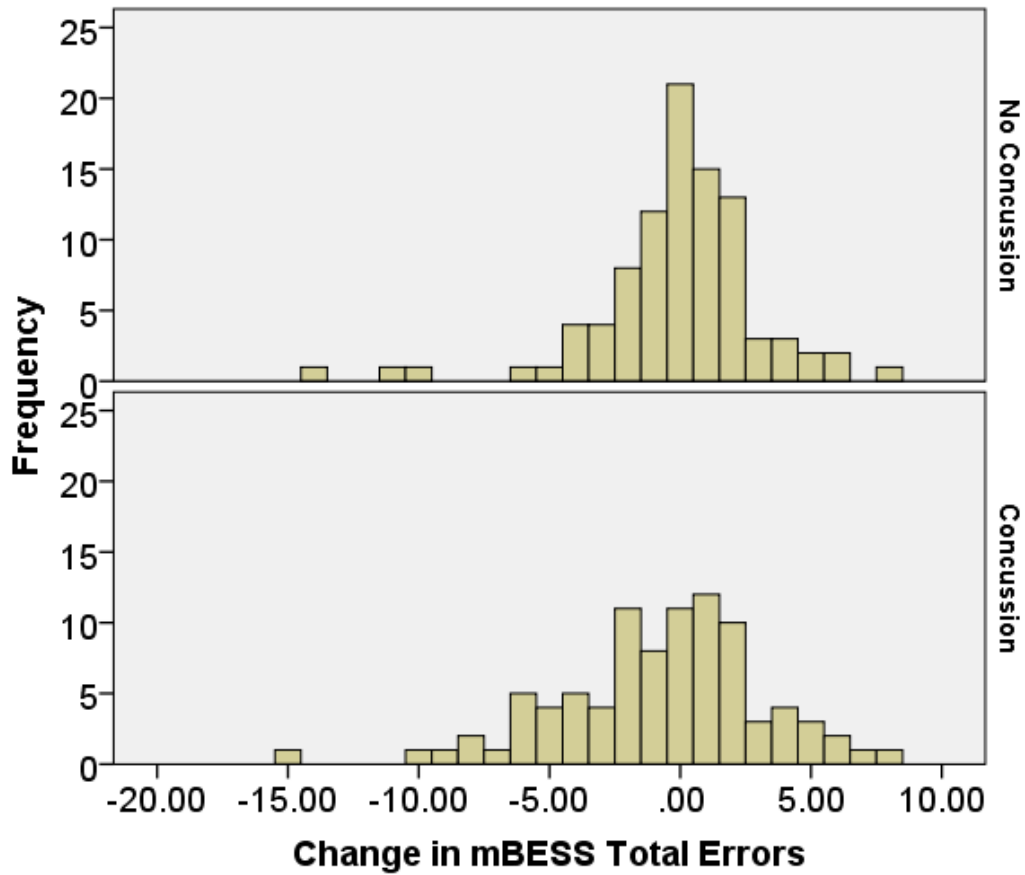

Supplement: inline-supplementary-material-1 [file inline-supplementary-material-1.pdf]
